# Supplementary material for: RNA polymerases IV and V are involved in olive fruit development
Source: Preprints.org preprint supplement (doi:10.20944/preprints202310.0621.v2), 2023-11-30
Supplement: Supplementary file 1 [file supplementary]

## Sheet: Suplementary1
Sample	Raw reads	Clean reads	Alignment rate
Flower_1	107520328	107513536	0.8607
Flower_2	99394762	99343898	0.6164
Flower_3	107837508	107802318	0.6024
Fruit_1	101135550	101108330	0.7747
Fruit_2	121335290	121329942	0.8581
Fruit_3	106935632	106929744	0.8579
Mix	100826768	100797600	0.6057
Total	744985838	744825368
